# Supplementary material for: Thermal Performances of UHMWPE/BN Composites Obtained from Different Blending Methods
Source: Hindawi journal article supplement (doi:10.1155/2019/8687450), 2019-12-20
Supplement: f1 [file 8687450.f1.doc]

**Supplementary Information**

Thermal Performances of UHMWPE/BN Composites Obtained from Different Blending Methods

Yi-you Guoa, Chang-lin Caoab, Hui-bin Chenga, Qing-hua Chenac, Bao-quan Huanga*, Fubin Luoa, Qing-rong Qiana*

a Engineering Research Center of Polymer Green Recycling of Ministry Education and Fujian Key Laboratory of Pollution Control & Resource Reuse, College of Environmental Science and Engineering, Fujian Normal University, Fuzhou 350007, China

b Key Laboratory for Polymeric Composite and Functional Materials of Ministry of Education and Key Laboratory of High Performance Polymer-based Composites of Guangdong Province, School of Chemistry, Sun Yat-Sen University, Guangzhou 510275, China

c Fujian Normal University Fuqing Branch, Fuzhou 350300, China

Correspondence should be addressed to Baoquan Huang (Email: qbh811@fjnu.edu.cn) and Qing-rong Qian (Email: qrqian@fjnu.edu.cn)

**Contents:**

**Figure S1.** TGA curves of UHMWPE particles with various relative molecular weight

**Taber S1.** Thermal data of UHMWPE nascent powder with different relative molecular weight

**Figure S2.** Schematic representation of S1, S2 and S3 for A and K

**Figure S3.** The plots of ln [ln (1-α)-1]. versus θ as shown for the UHMWPE with various relative molecular weights

**Taber S2.** Thermal data of UHMWPE nascent powder with different relative molecular weight





**Figure S1** TGA curves of UHMWPE particles with various relative molecular weight

Taber S1 Thermal stabilities of the composites with various relative molecular weights obtained from TGA curves

| **Relative molecular weight** | **Weight loss temperature/°C** | | | Tmax  （°C） | IPDT  （°C） | Ea  (kJ/mol) | R2 |
| --- | --- | --- | --- | --- | --- | --- | --- |
| T5 | T30 | T50 |
| 2.0×106 | 412.0 | 464.1 | 473.5 | 479.4 | 466.8 | 394.12 | 0.997 |
| 4.0×106 | 453.0 | 473.7 | 480.6 | 482.9 | 477.7 | 464.77 | 0.997 |
| 6.0×106 | 460.9 | 478.1 | 484.0 | 486.4 | 482.5 | 496.62 | 0.996 |





**Figure S2** Schematic representation of S1, S2 and S3 for A and K





**Figure S3** The plots of ln [ln (1-α)-1]. versus θ as shown for the UHMWPE with various relative molecular weights

**Taber S2** Related parameters of the Agari model obtained by calculation

| Sample | C1 | C2 |
| --- | --- | --- |
| Samples via MM | 1.04 | 0.96 |
| Samples via SM | 1.09 | 1.09 |
